# Supplementary material for: The photogenerated charge characteristics in Ni@NiO/CdS hybrids for increased photocatalytic H2 generation
Source: Royal Society of Chemistry journal article supplement (doi:10.1039/c9ra06034k), 2019-01-01
Supplement: c9ra06034k1.pdf [file c9ra06034k1.pdf]

## The photogenerated charge characteristics in Ni@NiO/CdS hybrids for increased photocatalytic H<sub>2</sub> generation

Lijing Zhang<sup>b\*</sup>, Xiufang Zhu<sup>b\*</sup>, Yuanyuan Zhao<sup>b</sup>, Pengyu Zhang<sup>b</sup>, Jing Chen<sup>b</sup>,  
Jinlong Jiang<sup>b</sup>, Tengfeng Xie<sup>a\*</sup>

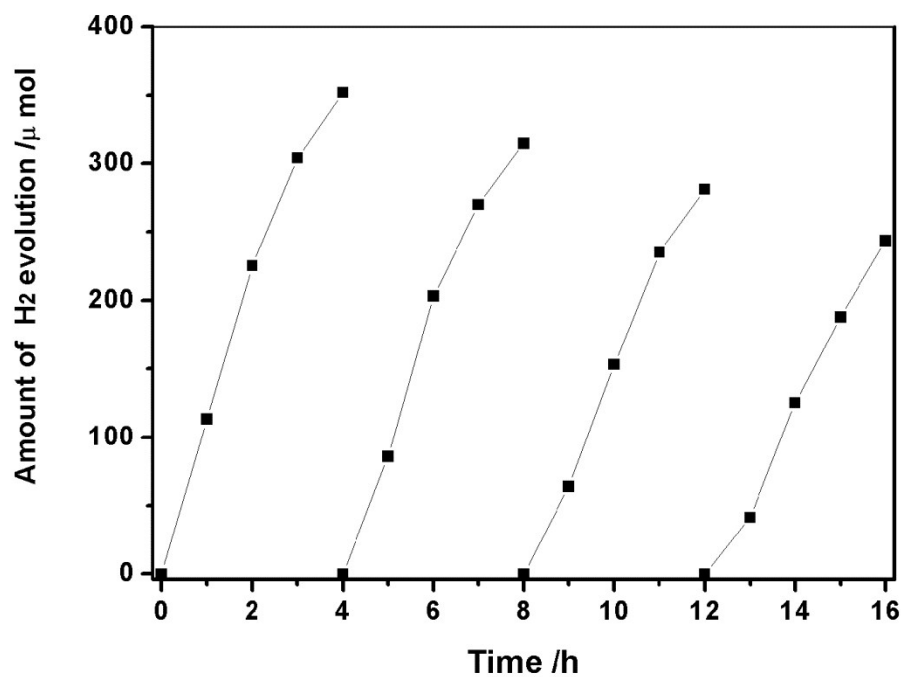

Figure S1. The cycle test of photocatalytic H<sub>2</sub> evolution of Ni@NiO/CdS photocatalyst.
